# Supplementary material for: Photodynamic therapy of severe hemorrhagic shock on yolk–shell MoS 2 nanoreactors
Source: Royal Society of Chemistry journal article supplement (doi:10.1039/d4ra04157g), 2024-01-01
Supplement: d4ra04157g1.pdf [file d4ra04157g1.pdf]

## Supporting Information

### Photodynamic therapy of severe hemorrhagic shock on Yolk-shell MoS<sub>2</sub> nanoreactors

*Yijun Zhang,<sup>‡ab</sup> Tianfeng Hua,<sup>‡ab</sup> Xiaoyi Huang,<sup>‡cd</sup> Rongrong Gu,<sup>cd</sup> Ruixi Chu,<sup>cd</sup>  
Yan Hu,<sup>ab</sup> Sheng Ye<sup>\*c</sup> and Min Yang<sup>\*ab</sup>*

<sup>a</sup>The Second Department of Critical Care Medicine, The Second Affiliated Hospital of Anhui Medical University, Hefei, Anhui 230001, China.

<sup>b</sup>Laboratory of Cardiopulmonary Resuscitation and Critical Care, the Second Affiliated Hospital of Anhui Medical University, Hefei, Anhui 230001, China.

<sup>c</sup>School of Materials and Chemistry, Anhui Agricultural University, Hefei, Anhui 230036, China.

<sup>d</sup>College of Animal Science and Technology, Anhui Agricultural University, Hefei, Anhui 230036, China.

Email: [yangmin@ahmu.edu.cn](mailto:yangmin@ahmu.edu.cn) (Min Yang), [sye503@ahau.edu.cn](mailto:sye503@ahau.edu.cn) (Sheng Ye).

## Contents

### Supplementary Figures

**Fig. S1** The flow for the as-prepared Yolk-shell Au@MoS<sub>2</sub> materials.

**Fig. S2** (a-d) TEM images of the Yolk-shell MoS<sub>2</sub>.

**Fig. S3** (a-d) TEM images of the Yolk-shell Au@MoS<sub>2</sub>.

**Fig. S4** Impedance diagram of Yolk-shell Au@MoS<sub>2</sub>.

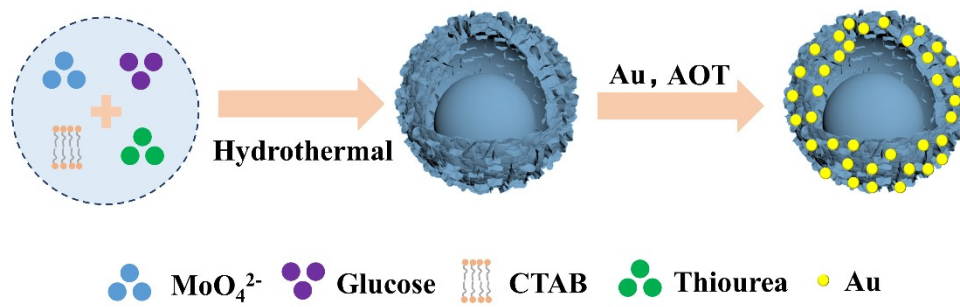

**Fig. S1** The flow for the as-prepared Yolk-shell Au@MoS<sub>2</sub> materials.

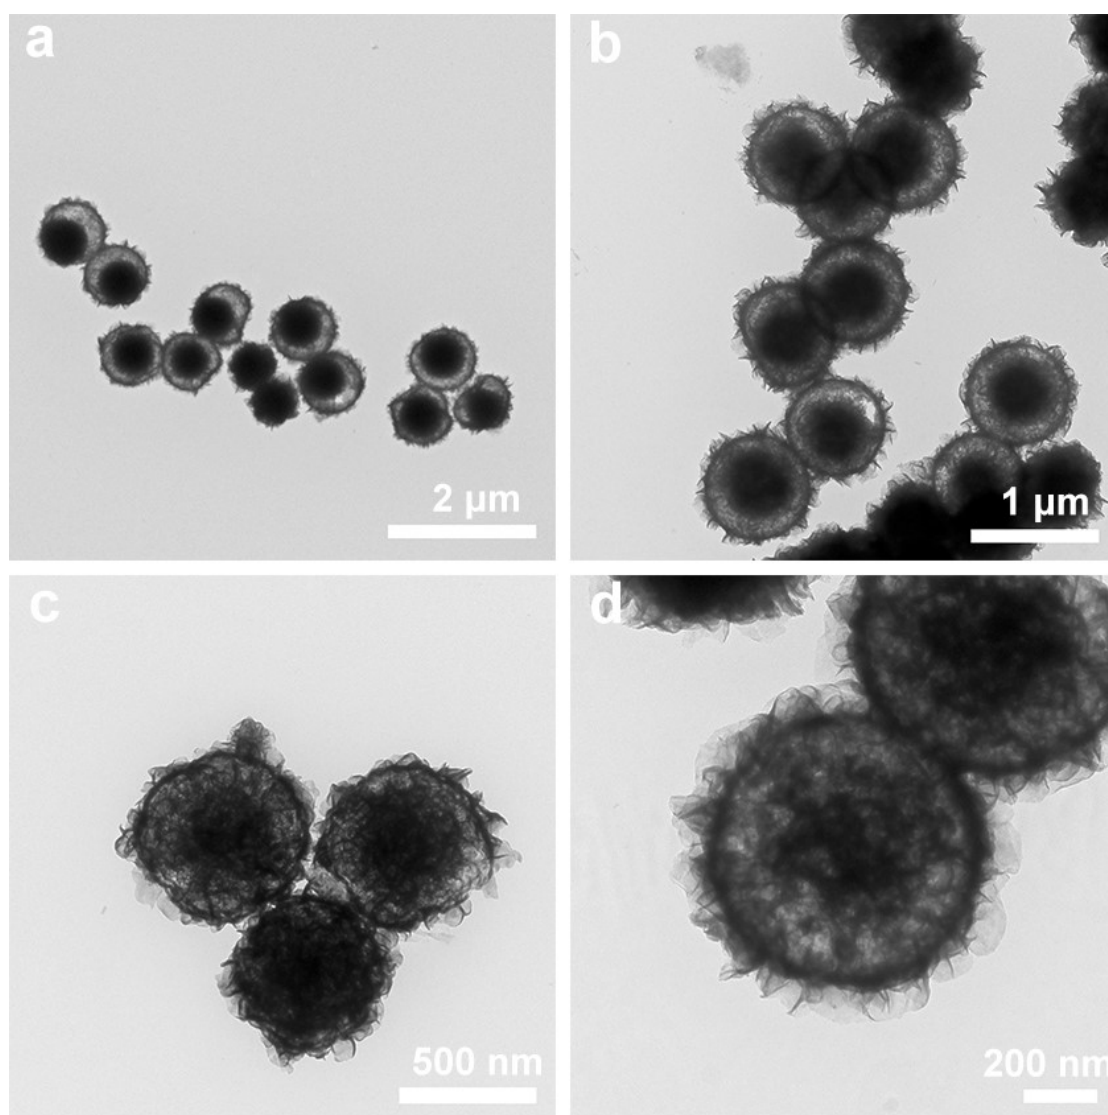

**Fig. S2** TEM images of the Yolk-shell MoS<sub>2</sub>.

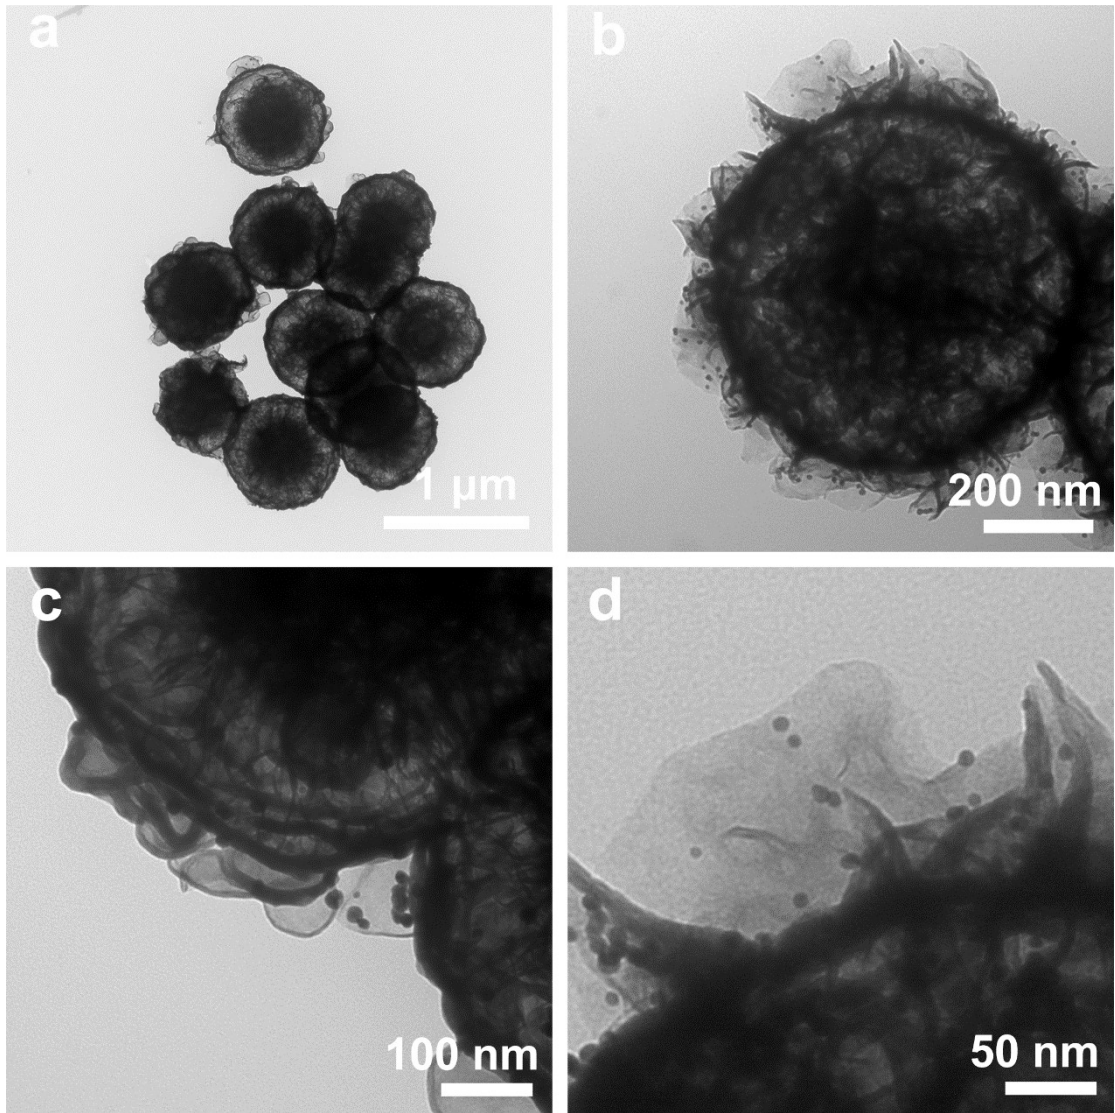

**Fig. S3** TEM images of the Yolk-shell Au@MoS<sub>2</sub>.

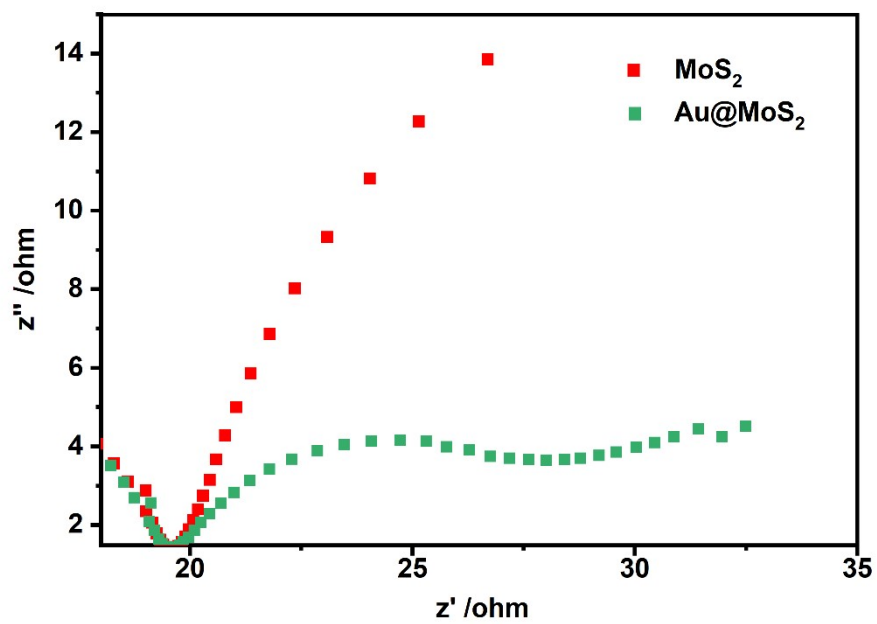

Fig. S4 Impedance diagram of Yolk-shell Au@MoS<sub>2</sub>.
